# Supplementary material for: A dopamine-induced gene expression signature regulates neuronal function and cocaine response
Source: PubMed Central journal article supplement — Sci Adv. 2020 Jun 24;6(26):eaba4221. doi: 10.1126/sciadv.aba4221 (PMC7314536; doi:10.1126/sciadv.aba4221), 2020-06-24
Supplement: aba4221_SM.pdf [file aba4221_SM.pdf]

## Supplementary Materials for

### **A dopamine-induced gene expression signature regulates neuronal function and cocaine response**

Katherine E. Savell, Jennifer J. Tuscher, Morgan E. Zipperly, Corey G. Duke, Robert A. Phillips III, Allison J. Bauman, Saakshi Thukral, Faraz A. Sultan, Nicholas A. Goska, Lara Ianov, Jeremy J. Day\*

\*Corresponding author. Email: [jjday@uab.edu](mailto:jjday@uab.edu)

Published 24 June 2020, *Sci. Adv.* **6**, eaba4221 (2020)  
DOI: 10.1126/sciadv.aba4221

#### **The PDF file includes:**

Figs. S1 to S7

#### **Other Supplementary Material for this manuscript includes the following:**

(available at [advances.sciencemag.org/cgi/content/full/6/26/eaba4221/DC1](https://advances.sciencemag.org/cgi/content/full/6/26/eaba4221/DC1))

Tables S1 to S12

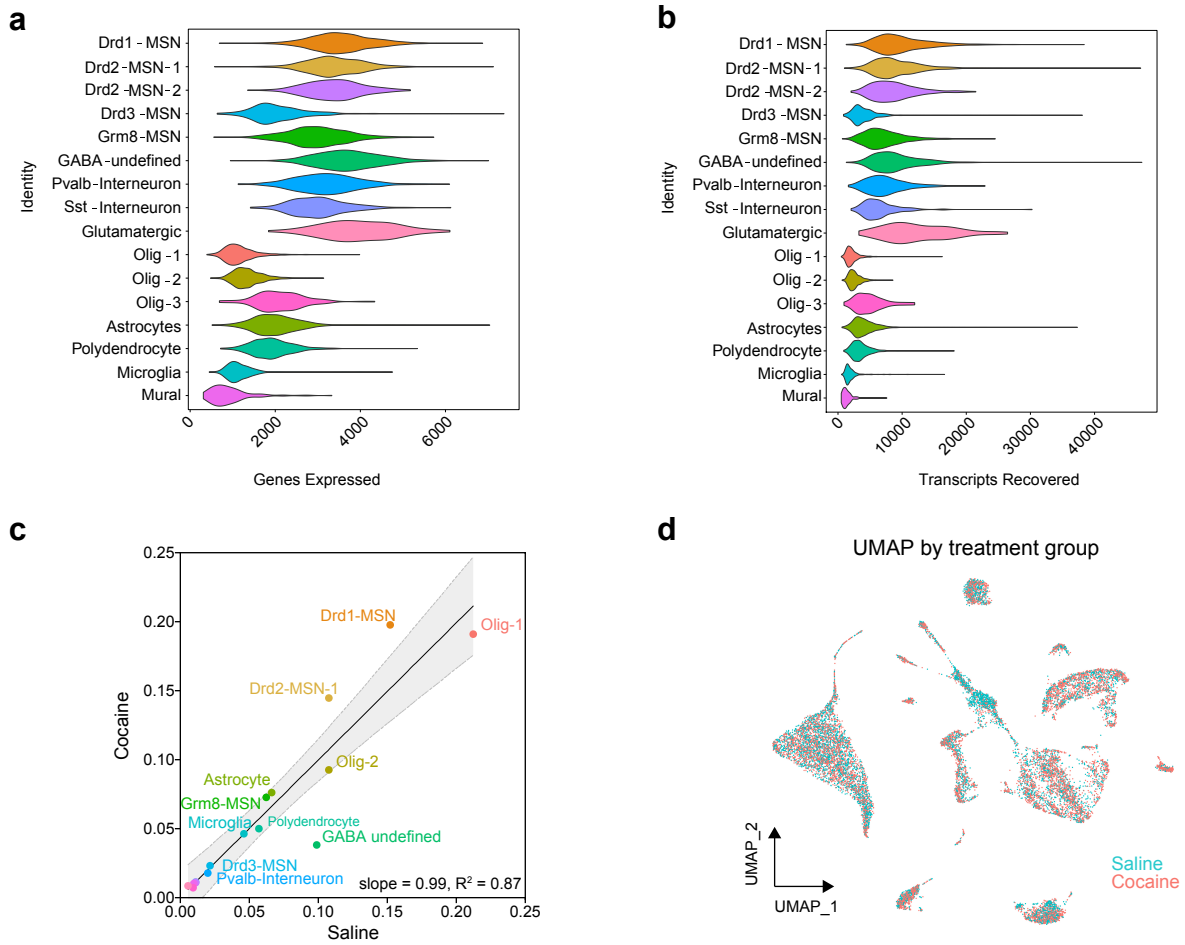

**Supplementary Figure 1. Identification of cell types within the rat nucleus accumbens.** **a**, Violin plots indicating the distribution of number of total genes expressed by cell class. **b**, Violin plot indicating the distribution of number of transcripts recovered by cell class. **c**, Fraction of cocaine and saline-treated neurons within each cluster. **d**, UMAP showing distribution of cells from saline- and cocaine-treated rats.

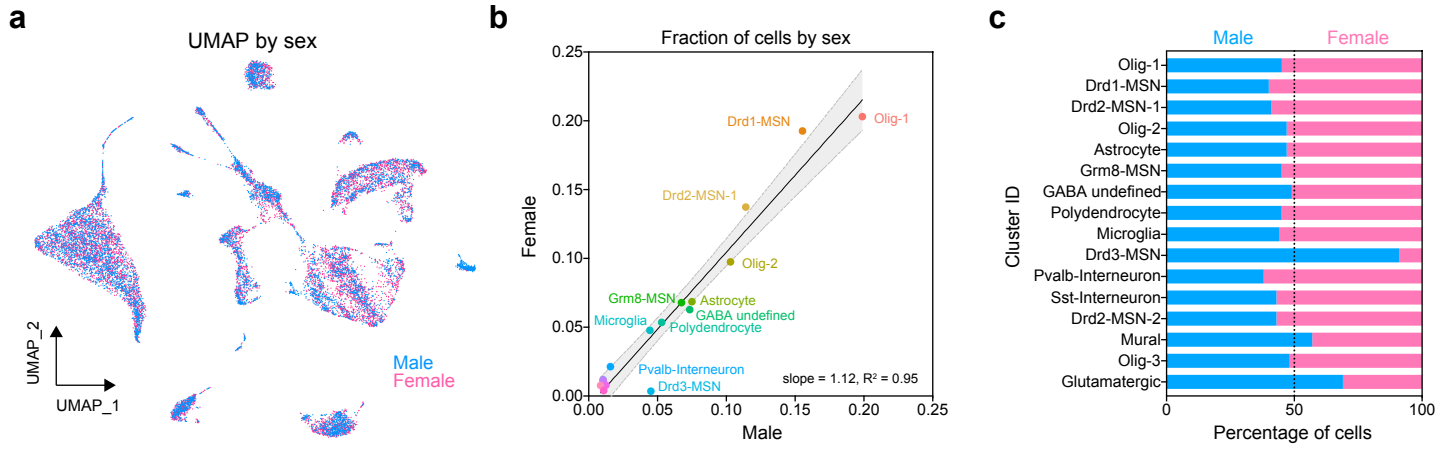

**Supplementary Figure 2. Sex differences in NAc cell distribution.** **a**, Global UMAP showing male and female cells following Seurat integration. **b**, Linear regression of male and female cell fractions reveals highly similar cell distribution in nearly all cell clusters, with the exception of Drd3-MSNs. **c**, Percentage of each cluster accounted for by male and female cells. Over 90% of Drd3-MSNs were obtained from male animals.

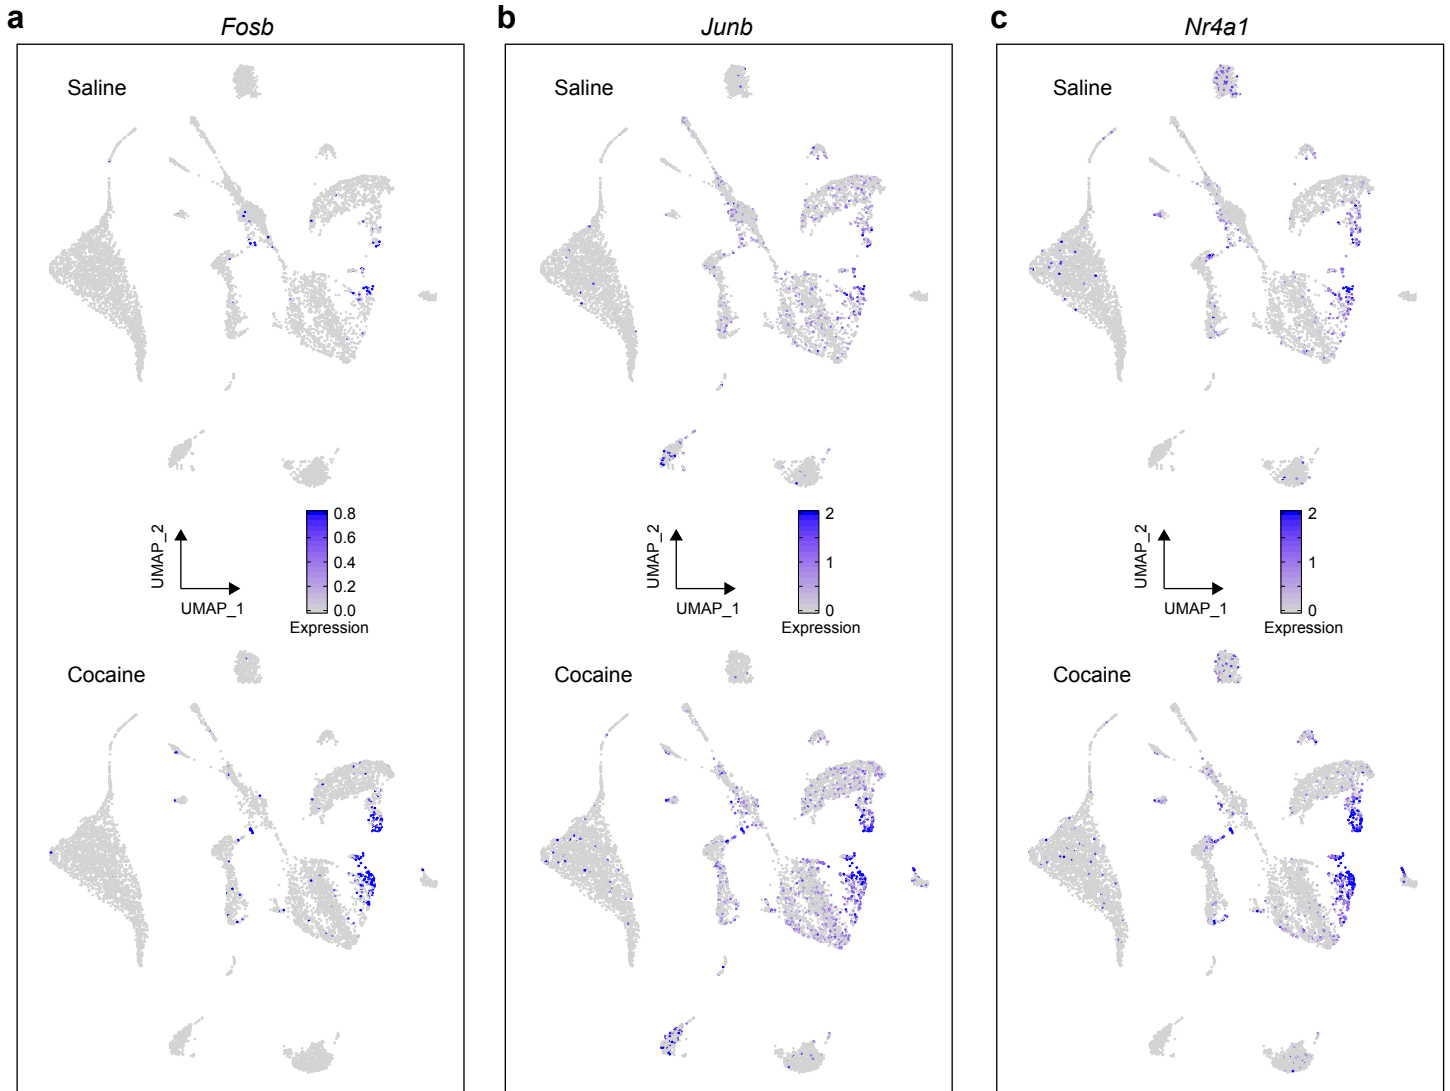

**Supplementary Figure 3. Cocaine induces immediate early gene response in Drd1-MSNs.** a-c, Global UMAPs plotting expression values of *Fosb*, *Junb*, and *Nr4a1*. For each gene, cocaine increases mRNA abundance in the Drd1-MSN population.

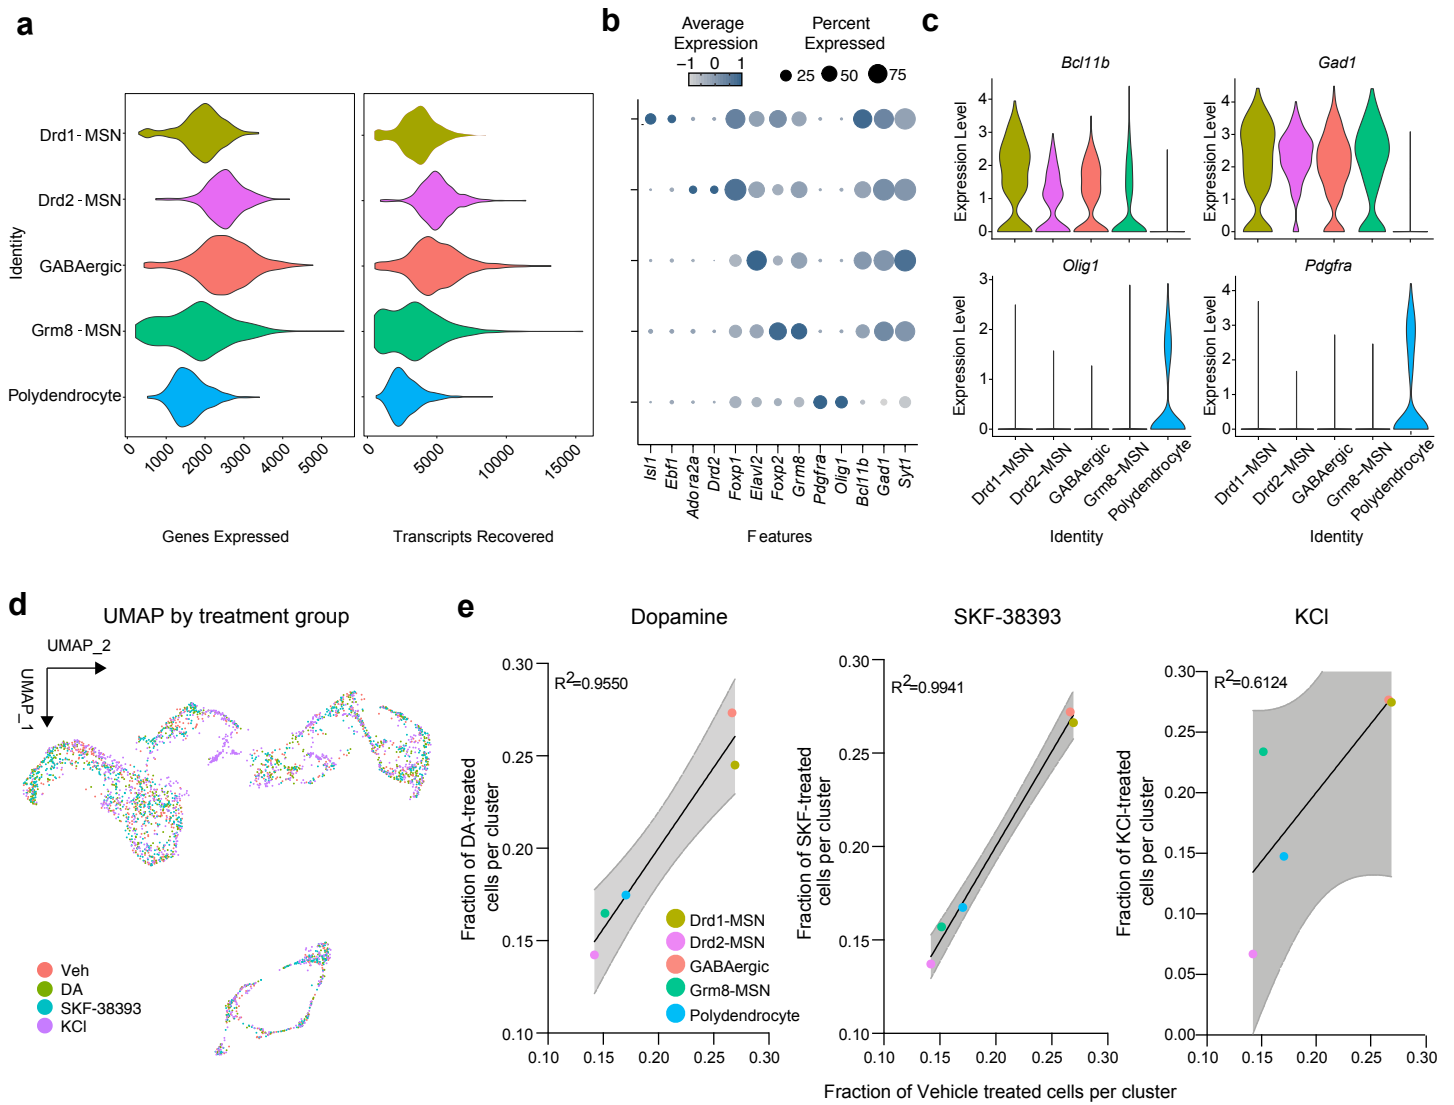

**Supplementary Figure 4. Identification of cell types within rat embryonic striatal neurons.** **a**, Violin plots indicating the number of genes expressed and transcripts recovered in each cluster **b**, Dot plot indicating the average expression and percent of cells expressing marker genes of each identified cell type. **c**, Violin plots indicating the distribution of neuronal (*Bcl11b*, *Gad1*) and glial (*Olig1*, *Pdgfra*) marker genes. **d**, Distribution of DA-, KCl-, SKF-treated cells. **e**, Fraction of DA-, KCl-, or SKF-treated cells within each cluster.

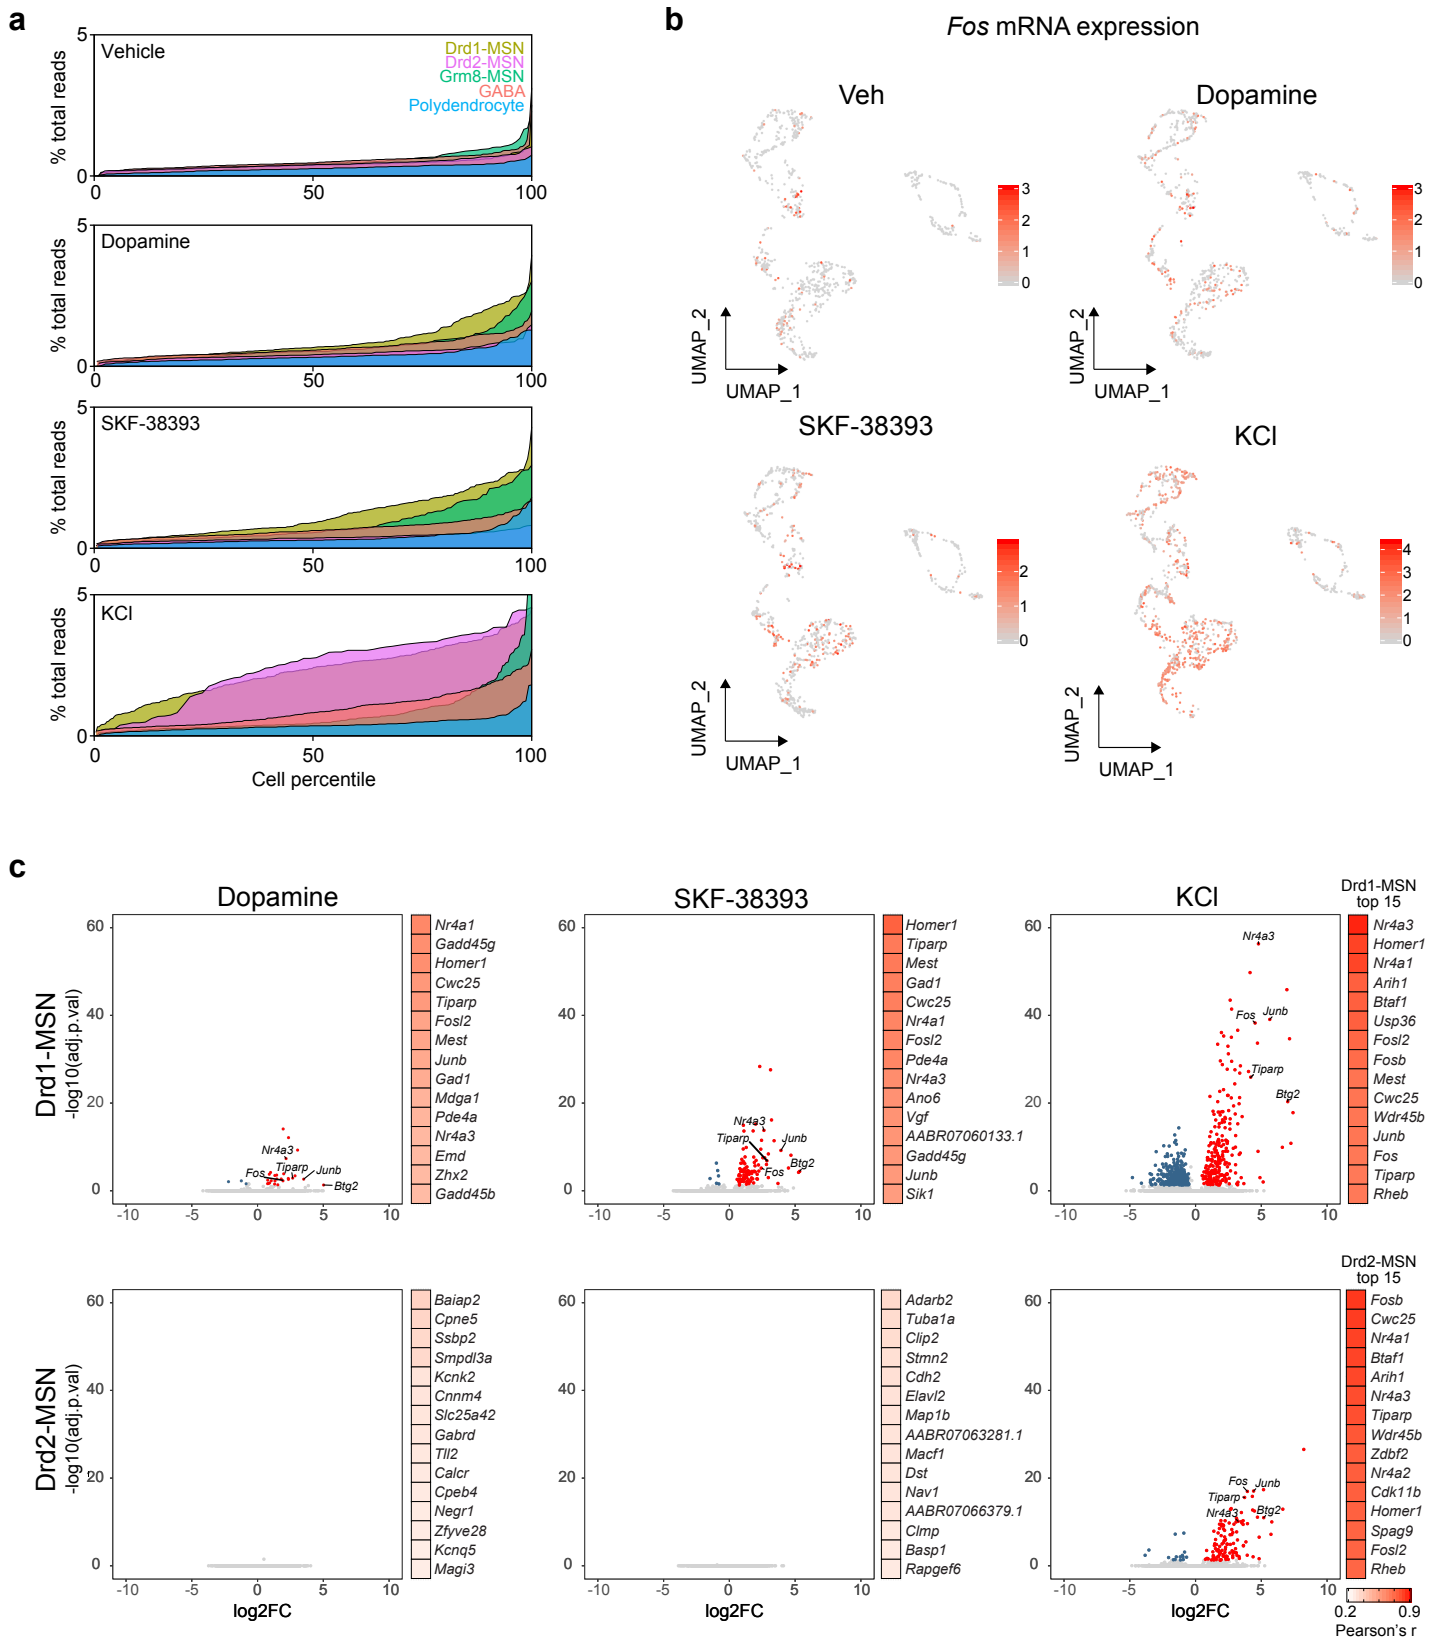

**Supplementary Figure 5. Treatment-induced changes in gene expression in cultured striatal neurons are cell type-specific.** **a**, Percent of reads aligning to 100 DA-DEGs for each cell across treatment groups from cell culture snRNA-seq experiment. Cells percentiled due to different numbers in each cluster. **b**, UMAPs of *Fos* gene expression changes across DA, SKF, and KCI treatment groups. **c**, Volcano plots showing all DEGs (adjusted  $p$  value  $< 0.05$ , absolute value of  $\log_2(\text{fold change}) > 0.5$ ) and top 15 EES correlating genes for Drd1- and Drd2-MSNs. DA and SKF-38393 induce transcriptional responses in Drd1-MSNs only, while KCI induces a large-scale transcriptional response in both cell types.

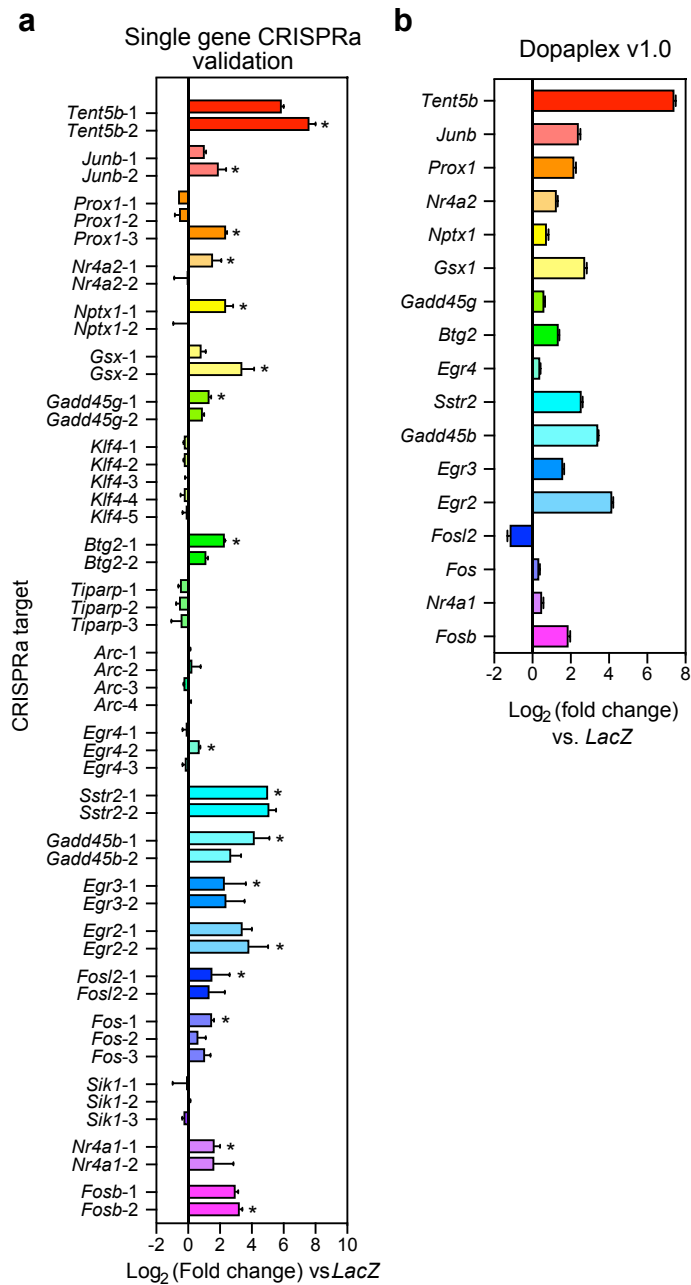

**Supplementary Figure 6. CRISPRa validation at single gene targets.** **a**, Single guide RNAs targeted with dCas9-VPR to DA-induced genes results in validated induction in 16 out of 23 genes, as compared to a *LacZ* control sgRNA ( $n = 2/\text{group}$ ). Asterisks indicate sgRNAs selected for multiplexed targeting. **b**, Lentiviral vectors expressing sgRNAs validated individually to upregulate target genes were pooled to target 17 DA-induced genes simultaneously. Simultaneous targeting resulted in induction of all but one gene ( $n = 5/\text{group}$ ). All data are expressed as mean  $\pm$  s.e.m.

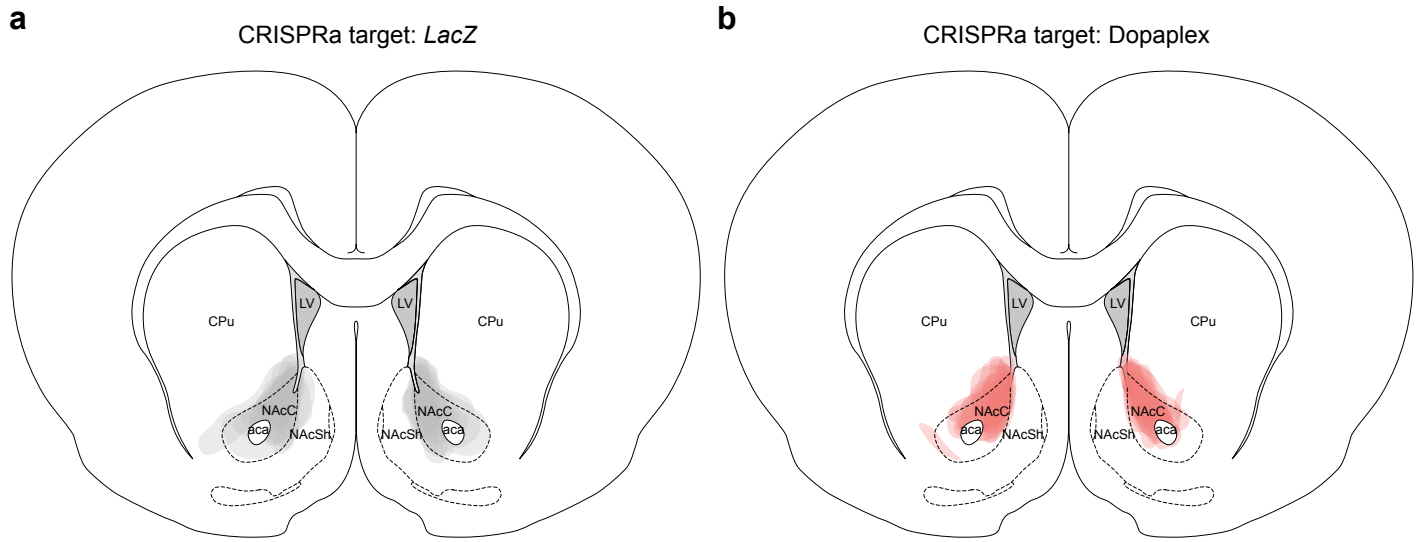

**Supplementary Figure 7. Viral placement validation for animals infused with CRISPRa constructs.** CRISPRa lentivirus targeted to either the bacterial gene *LacZ* (**a**) or Dopaplex genes (**b**) were infused into the nucleus accumbens core (NAcC). Schematics of target regions illustrate viral spread, as determined from mCherry signal expressed by sgRNA array vector. NAcC: nucleus accumbens core; NAcSh: nucleus accumbens shell; CPu: caudate putamen; LV: lateral ventricle.
